# Supplementary material for: Self-aggregation mechanisms of N-alkyl derivatives of urea and thiourea
Source: Royal Society of Chemistry journal article supplement (doi:10.1039/c3cp53582g), 2013-12-16
Supplement: c3cp53582g_3.pdf [file c3cp53582g_3.pdf]

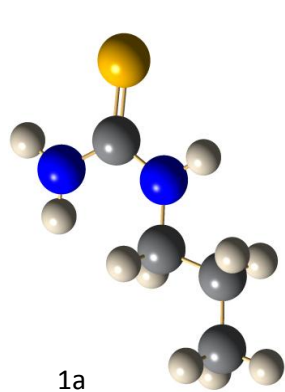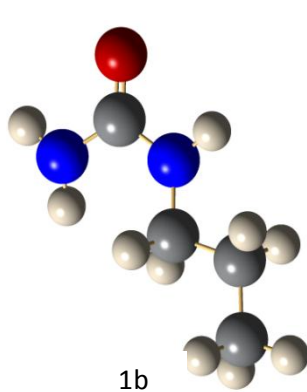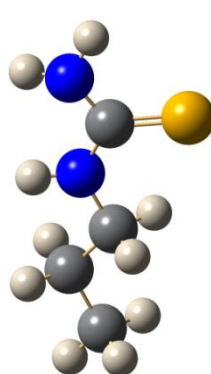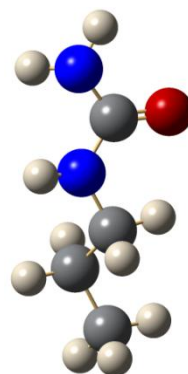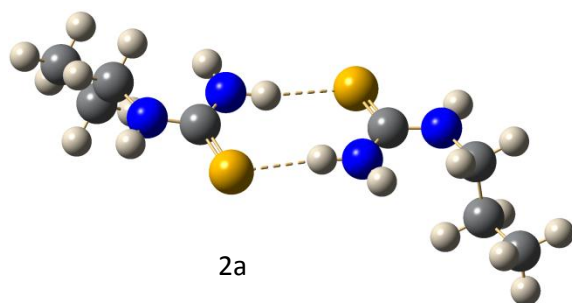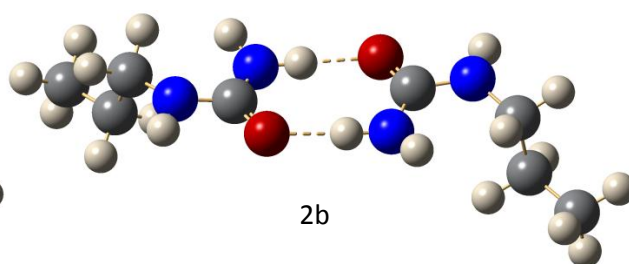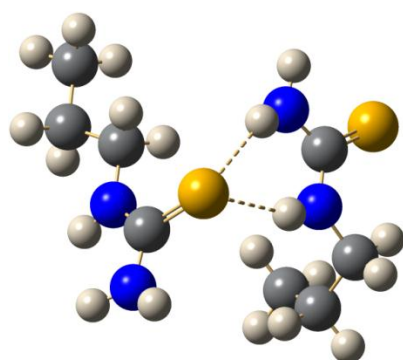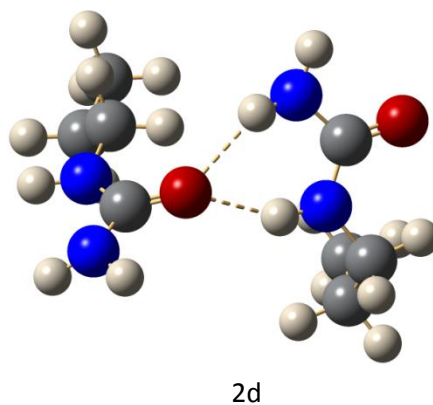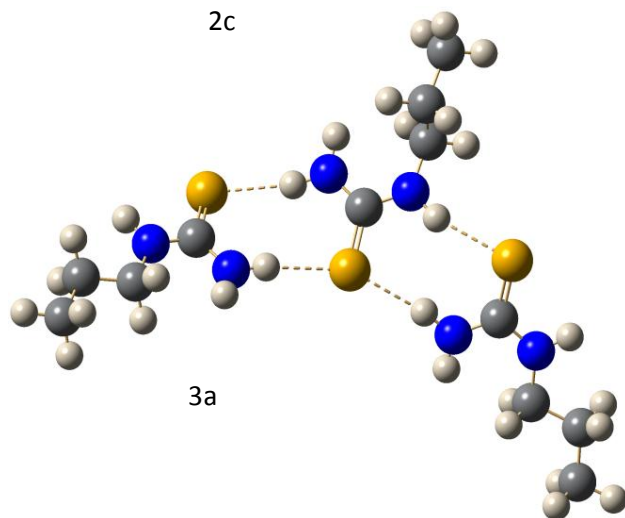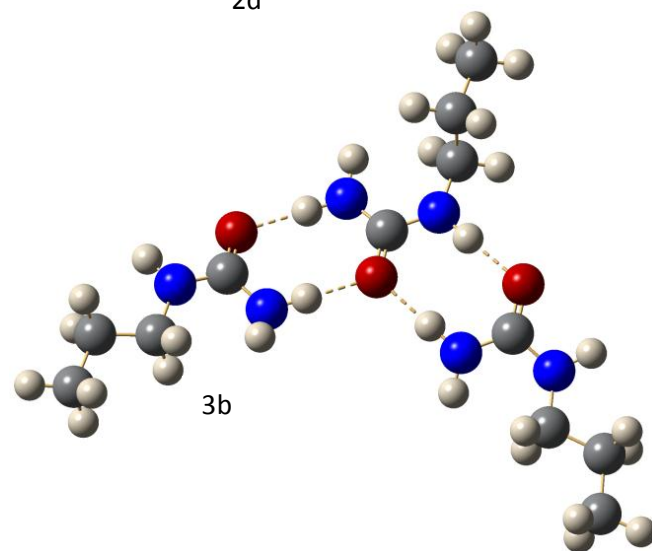

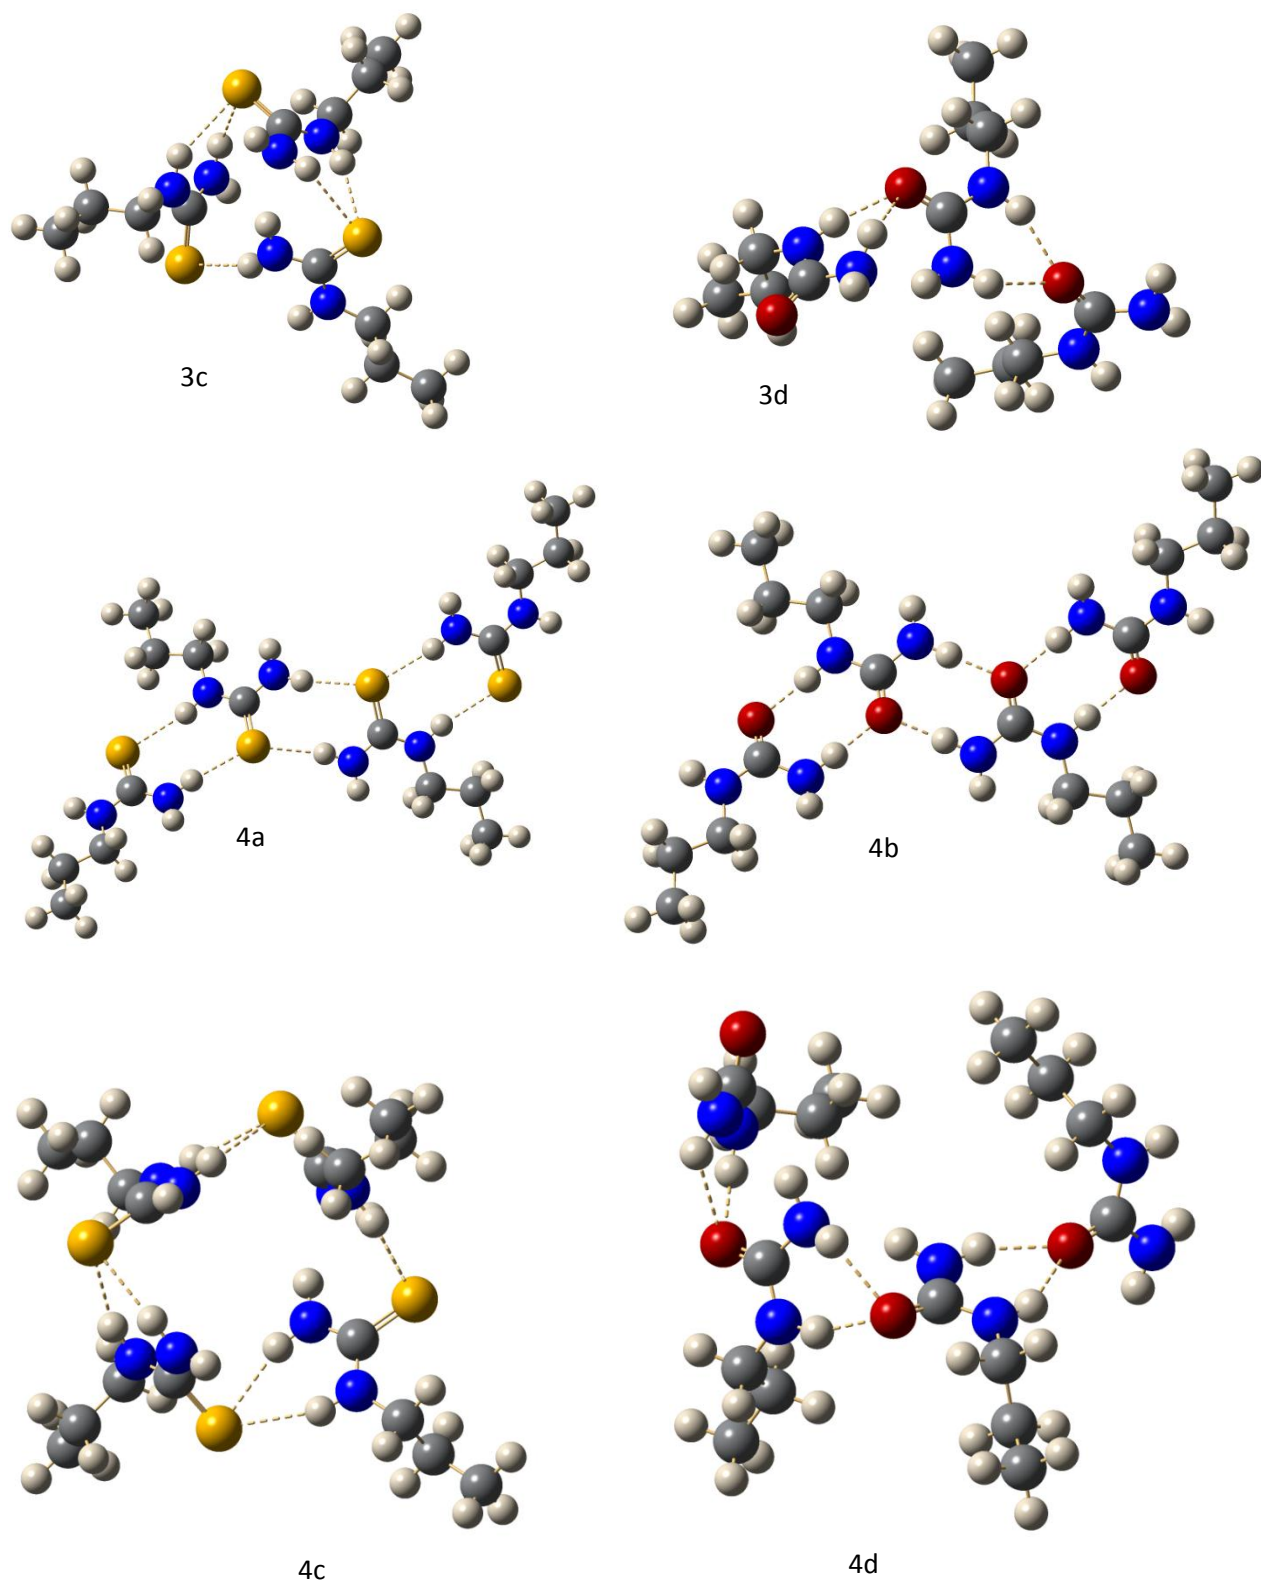

**Schema 1S** Calculated conformers of N-propylurea (NPU) and N-propylthiourea (NPTU): monomers (1), dimers (2), trimers (3), tetramers (4): cis: a –NPTU, b-NPU; trans: c-NPTU, d-NPU;
